# Supplementary material
Source: Springer Nature journal article supplement (https://www.springermedizin.de/resource/supplementary/12889_2014_7458_MOESM1_ESM.pdf/9497422)

**ST, LPA and MVPA Daily Patterns During Weekdays**

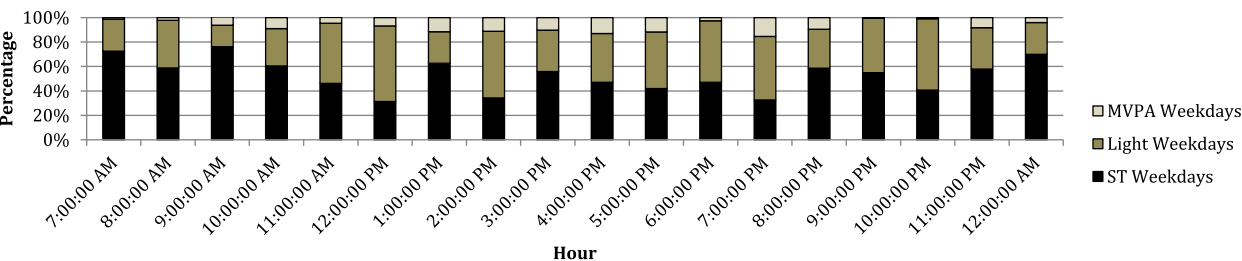

**ST, LPA and MVPA Daily Patterns During Weekend Days**

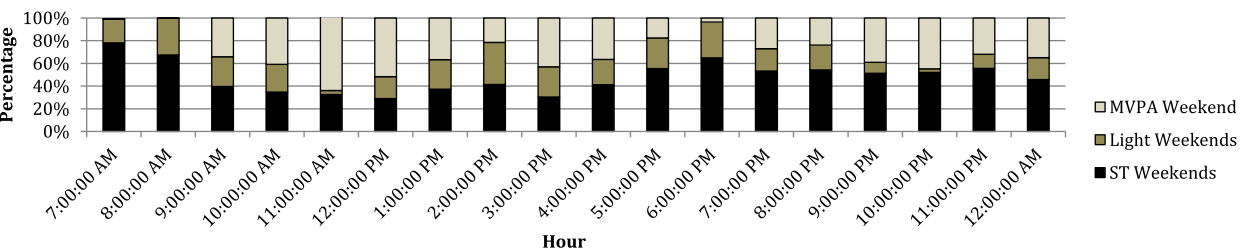

**Weekday ST, LPA and MVPA for Younger vs. Older Age Group**

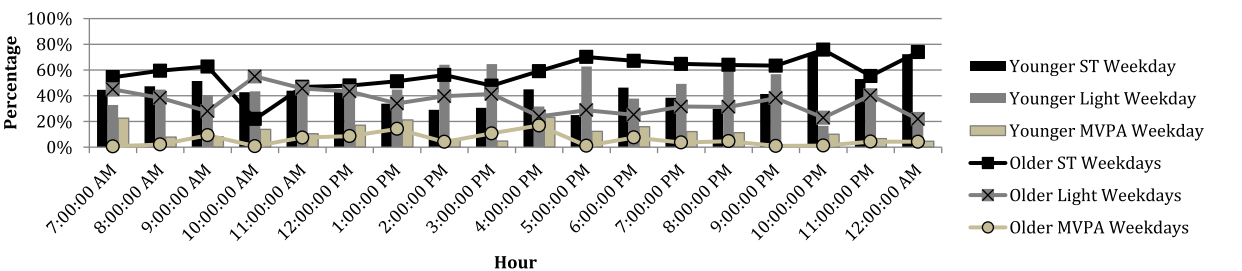

**Weekend Day ST, LPA and MVPA for Younger vs. Older Age Group**

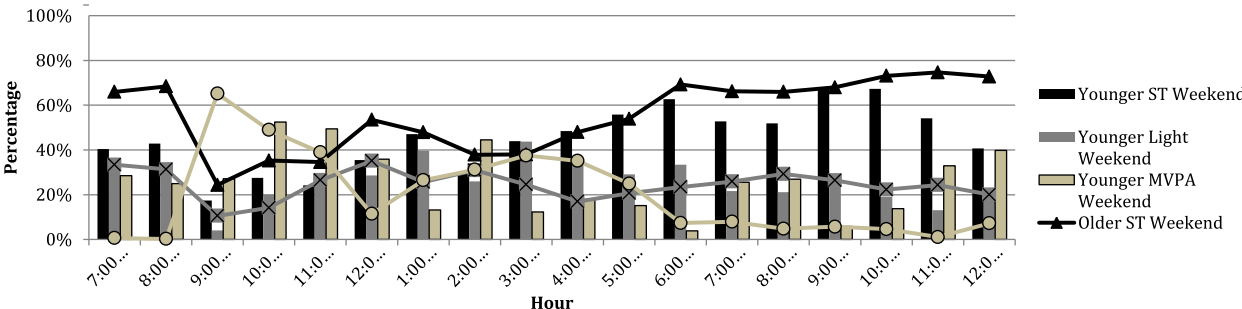

Supplement: MOESM1 [file 9497422]
